# Supplementary material
Source: publisher figshare collection journal article supplement (https://acs.figshare.com/ndownloader/files/26350537)
Supplement: Supplementary file 1 [file 26350537]

Compound_ID	SMILES	HCT-116 IC50(¦ÌM)	SW480 IC50 (¦ÌM)
1a	n1c(nc2c(c1Cl)ncn2C(C)CCO)F	19.76 ¡À 1.46	16.83 ¡À 1.09
2a	n1c(nc2c(c1Cl)ncn2C(CC)CCO)F	18.85 ¡À 1.22	19.84 ¡À 1.11
3a	n1c(nc2c(c1Cl)ncn2C(CCO)CCC)F	16.47 ¡À 3.03	17.19 ¡À 1.69
4a	n1c(nc2c(c1Cl)ncn2C(CCO)CCCC)F	13.46 ¡À 2.33	13.18 ¡À 2.01
5a	n1c(nc2c(c1Cl)ncn2C(CCO)CCCCC)F	8.66 ¡À 1.48	7.44 ¡À 1.25
6a	n1c(nc2c(c1Cl)ncn2C(CCO)CCCCCC)F	9.96 ¡À 0.72	12.94 ¡À 1.39
7a	n1c(nc2c(c1Cl)ncn2C(CCO)CCCCCCC)F	17.57 ¡À 3.96	26.12 ¡À 2.26
8a	n1c(nc2c(c1Cl)ncn2C(CCO)CCCCCCCC)F	24.22 ¡À 4.17	14.98 ¡À 0.80
9a	n1c(nc2c(c1Cl)ncn2C(CCO)CCCCCCCCC)F	32.05 ¡À 2.42	12.46 ¡À 2.06
10a	n1c(nc2c(c1Cl)ncn2C(COCc1ccccc1)CCO)F	5.24 ¡À 0.65	7.17 ¡À 1.25
11a	n1c(nc2c(c1Cl)ncn2C(COCc1ccccc1)CCO)F	5.17 ¡À 0.75	7.24 ¡À 0.92
12a	n1c(nc2c(c1Cl)ncn2C(C*)CCO)F	7.78 ¡À 1.21	8.02 ¡À 0.75
13a	n1c(nc2c(c1Cl)ncn2CCCO)F	39.81 ¡À 3.72	29.70 ¡À 2.95
1b	n1cnc2c(c1Cl)ncn2C(CCO)C	>50	>50
2b	n1cnc2c(c1Cl)ncn2C(CCO)CC	>50	>50
3b	n1cnc2c(c1Cl)ncn2C(CCO)CCC	>50	>50
4b	n1cnc2c(c1Cl)ncn2C(CCO)CCCC	>50	>50
5b	n1cnc2c(c1Cl)ncn2C(CCO)CCCCC	>50	>50
6b	n1cnc2c(c1Cl)ncn2C(CCO)CCCCCC	11.94 ¡À 1.17	16.74 ¡À 2.12
7b	n1cnc2c(c1Cl)ncn2C(CCO)CCCCCCC	4.16 ¡À 2.39	3.63 ¡À 2.37
8b	n1cnc2c(c1Cl)ncn2C(CCO)CCCCCCCC	1.65 ¡À 0.43	1.37 ¡À 0.36
9b	n1cnc2c(c1Cl)ncn2C(CCO)CCCCCCCCC	0.89 ¡À 0.21	1.15 ¡À 0.31
10b	n1cnc2c(c1Cl)ncn2C(CCO)CCCCCCCCCC	4.93 ¡À 0.69	3.16 ¡À 0.36
11b	n1cnc2c(c1Cl)ncn2C(CCO)CCCCCCCCCCC	7.59 ¡À 0.62	5.29 ¡À 0.90
12b	n1cnc2c(c1Cl)ncn2C(CCO)CCCCCCCCCCCC	>50	>50
13b	n1cnc2c(c1Cl)ncn2C(COCc1ccccc1)CCO	>50	>50
14b	n1cnc2c(c1Cl)ncn2C(COCc1ccccc1)CCO	>50	>50
15b	n1cnc2c(c1Cl)ncn2C(C*)CCO	>50	31.70 ¡À 4.14
16b	n1cnc2c(c1Cl)ncn2C(CO)CCO	>50	>50
4c	n1c(nc2c(c1Cl)ncn2C(CCO)CCCC)Cl	15.49 ¡À 2.01	30.90 ¡À 1.39
5c	n1c(nc2c(c1Cl)ncn2C(CCO)CCCCC)Cl	6.17 ¡À 0.89	6.01 ¡À 0.85
6c	n1c(nc2c(c1Cl)ncn2C(CCO)CCCCCC)Cl	12.10 ¡À 1.68	12.42 ¡À 1.80
7c	n1c(nc2c(c1Cl)ncn2C(CCO)CCCCCCC)Cl	12.79 ¡À 1.75	13.56 ¡À 3.25
8c	n1c(nc2c(c1Cl)ncn2C(CCO)CCCCCCCC)Cl	22.15 ¡À 3.15	24.04 ¡À 2.49
9c	n1c(nc2c(c1Cl)ncn2C(CCO)CCCCCCCCC)Cl	32.56 ¡À 3.12	36.30 ¡À 1.75
4d	n1cnc2c(c1*)ncn2C(CCO)CCCC	>50	>50
5d	n1cnc2c(c1*)ncn2C(CCO)CCCCC	>50	>50
6d	n1cnc2c(c1*)ncn2C(CCO)CCCCCC	>50	>50
7d	n1cnc2c(c1*)ncn2C(CCO)CCCCCCC	15.28 ¡À 2.53	23.92 ¡À 2.16
8d	n1cnc2c(c1*)ncn2C(CCO)CCCCCCCC	12.77 ¡À 4.15	24.55 ¡À 4.37
9d	n1cnc2c(c1*)ncn2C(CCO)CCCCCCCCC	2.53 ¡À 0.25	3.25 ¡À 0.30
10d	n1cnc2c(c1*)ncn2C(CCO)CCCCCCCCCC	7.53 ¡À 0.83	8.26 ¡À 0.86
11d	n1cnc2c(c1*)ncn2C(CCO)CCCCCCCCCCC	8.23 ¡À 2.18	9.70 ¡À 1.41
5e	n1cnc2c(c1NC)ncn2C(CCO)CCCCC	>50	>50
6e	n1cnc2c(c1NC)ncn2C(CCO)CCCCCC	>50	>50
7e	n1cnc2c(c1NC)ncn2C(CCO)CCCCCCC	12.53 ¡À 3.01	15.26 ¡À 4.28
8e	n1cnc2c(c1NC)ncn2C(CCO)CCCCCCCC	3.73 ¡À 0.47	3.77 ¡À 0.71
9e	n1cnc2c(c1NC)ncn2C(CCO)CCCCCCCCC	5.41 ¡À 1.03	4.45 ¡À 0.91
10e	n1cnc2c(c1NC)ncn2C(CCO)CCCCCCCCCC	12.70 ¡À 1.43	11.99 ¡À 1.97
11e	n1cnc2c(c1NC)ncn2C(CCO)CCCCCCCCCCC	15.38 ¡À 2.29	12.79 ¡À 2.39
5f	n1cnc2c(c1N(C)C)ncn2C(CCO)CCCCC	>50	>50
6f	n1cnc2c(c1N(C)C)ncn2C(CCO)CCCCCC	>50	>50
7f	n1cnc2c(c1N(C)C)ncn2C(CCO)CCCCCCC	>50	>50
8f	n1cnc2c(c1N(C)C)ncn2C(CCCCCCCC)CCO	19.84 ¡À 2.67	21.61 ¡À 1.71
9f	n1cnc2c(c1N(C)C)ncn2C(CCCCCCCCC)CCO	9.81 ¡À 0.66	12.24 ¡À 1.33
10f	n1cnc2c(c1N(C)C)ncn2C(CCO)CCCCCCCCCC	5.49 ¡À 1.69	3.32 ¡À 0.69
11f	n1cnc2c(c1N(C)C)ncn2C(CCO)CCCCCCCCCCC	12.03 ¡À 0.99	11.75 ¡À 1.00
4g	n1cnc2c(c1N)ncn2C(CCCC)CCO	>50	>50
5g	n1cnc2c(c1N)ncn2C(CCCCC)CCO	>50	>50
6g	n1cnc2c(c1N)ncn2C(CCCCCC)CCO	>50	>50
7g	n1cnc2c(c1N)ncn2C(CCCCCCC)CCO	>50	>50
8g	n1cnc2c(c1N)ncn2C(CCCCCCCC)CCO	11.55 ¡À 1.81	20.68 ¡À 1.47
9g	n1cnc2c(c1N)ncn2C(CCCCCCCCC)CCO	10.54 ¡À 2.66	6.03 ¡À 1.62
10g	n1cnc2c(c1N)ncn2C(CCO)CCCCCCCCCC	2.59 ¡À 0.41	1.20 ¡À 0.17
11g	n1cnc2c(c1N)ncn2C(CCO)CCCCCCCCCCC	13.35 ¡À 2.66	11.61 ¡À 0.95
5h	n1c(nc2c(c1N)ncn2C(CCCCC)CCO)Cl	>50	>50
6h	n1c(nc2c(c1N)ncn2C(CCCCCC)CCO)Cl	>50	>50
7h	n1c(nc2c(c1N)ncn2C(CCCCCCC)CCO)Cl	>50	>50
8h	n1c(nc2c(c1N)ncn2C(CCCCCCCC)CCO)Cl	20.99 ¡À 2.76	13.14 ¡À 2.02
9h	n1c(nc2c(c1N)ncn2C(CCCCCCCCC)CCO)Cl	14.84 ¡À 3.19	12.22 ¡À 2.30
10h	n1c(nc2c(c1N)ncn2C(CCO)CCCCCCCCCC)Cl	11.83 ¡À 2.00	13.13 ¡À 1.24
11h	n1c(nc2c(c1N)ncn2C(CCO)CCCCCCCCCCC)Cl	19.95 ¡À 2.05	17.78 ¡À 1.08
5i	n1cnc2c(c1Cl)nc(n2C(CCCCC)CCO)Br	18.29 ¡À 1.33	23.81 ¡À 1.34
6i	n1cnc2c(c1Cl)nc(n2C(CCCCCC)CCO)Br	16.12 ¡À 1.15	14.13 ¡À 1.01
7i	n1cnc2c(c1Cl)nc(n2C(CCCCCCC)CCO)Br	16.22 ¡À 1.69	14.44 ¡À 1.52
8i	n1cnc2c(c1Cl)nc(n2C(CCCCCCCC)CCO)Br	22.39 ¡À 2.07	17.78 ¡À 1.13
9i	n1cnc2c(c1Cl)nc(n2C(CCCCCCCCC)CCO)Br	26.91 ¡À 3.79	24.98 ¡À 1.76
4j	n1cnc2c(c1)ncn2C(CCCC)CCO	>50	>50
5j	n1cnc2c(c1)ncn2C(CCCCC)CCO	>50	>50
6j	n1cnc2c(c1)ncn2C(CCCCCC)CCO	>50	>50
5k	n1cnc2c(c1Cl)ncn2C(CCCCC)C(=C)CO	>50	>50
6k	n1cnc2c(c1Cl)ncn2C(CCCCCC)C(=C)CO	30.21 ¡À 2.35	32.03 ¡À 2.08
7k	n1cnc2c(c1Cl)ncn2C(CCCCCCC)C(=C)CO	22.39 ¡À 2.18	29.42 ¡À 2.01
8k	n1cnc2c(c1Cl)ncn2C(CCCCCCCC)C(=C)CO	19.43 ¡À 2.06	16.22 ¡À 1.29
9k	n1cnc2c(c1Cl)ncn2C(CCCCCCCCC)C(=C)CO	>50	27.61 ¡À 1.90
10k	n1cnc2c(c1Cl)ncn2C(c1ccccc1)C(=C)CO	33.33 ¡À 3.13	12.91 ¡À 3.97
9ba	n1cnc2c(c1Cl)ncn2C(CCCS(=O)(=O)O)CCCCCCCCC	5.44 ¡À 0.47	5.39 ¡À 1.28
9bb	n1cnc2c(c1Cl)ncn2C(CC*)CCCCCCCCC	1.04 ¡À 0.28	1.20 ¡À 0.58
9bc	n1cnc2c(c1Cl)ncn2C(CCn1nnc(c1)c1ccccc1)CCCCCCCCC	13.49 ¡À 3.77	9.92 ¡À 2.17
9bd	n1cnc2c(c1Cl)ncn2C(CCCl)CCCCCCCCC	10.18 ¡À 2.55	7.18 ¡À 2.26
9be	n1cnc2c(c1Cl)ncn2C(CCCCCCCCC)CCOCP(=O)(OCC)OCC	9.11 ¡À 1.04	4.79 ¡À 1.63
9bf	n1cnc2c(c1Cl)ncn2C(CCCCCCCCC)CCOCP(=O)(O)O	>50	>50
£¨R£©-7b	n1cnc2c(c1Cl)ncn2[C@@H](CCO)CCCCCCC	2.67 ¡À 0.37	2.93 ¡À 0.38
£¨S£©-7b	n1cnc2c(c1Cl)ncn2[C@H](CCO)CCCCCCC	10.72 ¡À 0.91	3.82 ¡À 0.97
£¨R£©-8b	n1cnc2c(c1Cl)ncn2[C@@H](CCO)CCCCCCCC	1.12 ¡À 0.28	0.32 ¡À 0.25
£¨S£©-8b	n1cnc2c(c1Cl)ncn2C(CCO)CCCCCCCC	3.40 ¡À 0.64	2.33 ¡À 0.40
£¨R£©-9b	n1cnc2c(c1Cl)ncn2[C@@H](CCO)CCCCCCCCC	0.45 ¡À 0.10	1.63 ¡À 0.35
£¨S£©-9b	n1cnc2c(c1Cl)ncn2[C@H](CCO)CCCCCCCCC	1.05 ¡À 0.16	3.62 ¡À 0.66
£¨R£©-9ba	n1cnc2c(c1Cl)ncn2[C@@H](CCCS(=O)(=O)O)CCCCCCCCC	9.48 ¡À 1.58	9.72 ¡À 1.06
£¨R£©-9bb	n1cnc2c(c1Cl)ncn2[C@@H](CC*)CCCCCCCCC	1.19 ¡À 0.27	1.22 ¡À 0.58
£¨R£©-9bc	n1cnc2c(c1Cl)ncn2[C@@H](CCn1nnc(c1)c1ccccc1)CCCCCCCCC	8.13 ¡À 1.02	8.57 ¡À 0.89
£¨R£©-9bd	n1cnc2c(c1Cl)ncn2[C@@H](CCCl)CCCCCCCCC	9.58 ¡À 2.46	3.18 ¡À 0.97
£¨R£©-9be	n1cnc2c(c1Cl)ncn2[C@H](CCCCCCCCC)CCOCP(=O)(OCC)OCC	10.91 ¡À 1.26	5.57 ¡À 1.43
17	C(CCCCCCCCC)(CC=O)n1c2ncnc(c2nc1)Cl
18	C(CCCCCCCCC)(CC(=O)O)n1c2ncnc(c2nc1)Cl
19	NCCCCCNC(=O)OC(C)(C)C
20	C(CCCCCCCCC)(CC(=O)NCCCCCNC(=O)OC(C)(C)C)n1c2ncnc(c2nc1)Cl
21	C(CCCCCCCCC)(CC(=O)NCCCCCNC(=O)CCCC[C@@H]1SC[C@H]2[C@@H]1NC(=O)N2)n1c2ncnc(c2nc1)Cl
22	C1(N=N1)(CCC#C)CCN
23	C(CCCCCCCCC)(CC(=O)NCCC1(CCC#C)N=N1)n1c2ncnc(c2nc1)Cl
